# Supplementary material for: High prevalence of multiple antibiotic resistance in clinical E. coli isolates from Bangladesh and prediction of molecular resistance determinants using WGS of an XDR isolate
Source: PubMed Central journal article supplement (PMC8613203; doi:10.1038/s41598-021-02251-w), 2021-11-24
Supplement: 41598_2021_2251_MOESM3_ESM.pdf [file 41598_2021_2251_MOESM3_ESM.pdf]

**High prevalence of multiple antibiotic resistance in clinical *E. coli* isolates from Bangladesh and prediction of molecular resistance determinants using WGS of an XDR isolate**

Preeti Jain<sup>1</sup>, Asim Kumar Bepari<sup>1</sup>, Prosengit Kumer Sen<sup>1</sup>, Tanzir Rafe<sup>1</sup>, Rashed Imtiaz<sup>1</sup>, Maqsd Hossain<sup>2,3</sup>, Hasan Mahmud Reza<sup>1\*</sup>

<sup>1</sup>Department of Pharmaceutical Sciences, North South University, Dhaka, Bangladesh

<sup>2</sup>NSU Genome Research Institute (NGRI), North South University, Dhaka, Bangladesh

<sup>3</sup>Department of Biochemistry and Microbiology, North South University, Dhaka, Bangladesh

Table S1: Numbers of specialty genes in L16, K-12 substr. MG1655 and O157:H7 str. Sakai.

| <b>Property</b>       | <b>Source</b> | <b>K-12 substr.<br/>MG1655</b> | <b>O157:H7 str.<br/>Sakai</b> | <b>L16</b> |
|-----------------------|---------------|--------------------------------|-------------------------------|------------|
| Antibiotic Resistance | CARD          | 75                             | 77                            | 84         |
|                       | NDARO         | 1                              | 1                             | 6          |
|                       | PATRIC        | 74                             | 80                            | 65         |
| Drug Target           | DrugBank      | 387                            | 385                           | 388        |
|                       | TTD           | 58                             | 60                            | 59         |
| Transporter           | TCDB          | 892                            | 909                           | 874        |
| Virulence Factor      | PATRIC_VF     | 215                            | 283                           | 214        |
|                       | VFDB          | 60                             | 128                           | 95         |
|                       | Victors       | 230                            | 297                           | 229        |

Table S2: Unique genes in L16 compared to other 46 *E. coli* assemblies from Bangladesh

| <b>Annotation</b>                                  | <b>Number of Genes</b> | <b>Genes</b>          |
|----------------------------------------------------|------------------------|-----------------------|
| CP4-57 prophage; predicted antirestriction protein | 2                      | <i>YffX_3, yffX_4</i> |
| DLP12 prophage; DNA packaging protein              | 1                      | <i>nohB_1</i>         |
| DLP12 prophage; predicted murein endopeptidase     | 1                      | <i>rzpD_2</i>         |
| DsdC DNA-binding transcriptional dual regulator    | 1                      | <i>dsdC_1</i>         |
| Hypothetical protein                               | 17                     | -                     |
| InsAB' transposase                                 | 1                      | <i>insAB-1</i>        |
| IS1 protein InSA                                   | 1                      | <i>insA-1</i>         |
| Protein SopB                                       | 2                      | <i>SopB_1, sopB_2</i> |

Table S3: Eight public genomes closely related to L16.

| <b>Genome Name</b>                        | <b>GenBank Accessions</b> | <b>Collection Date</b> | <b>Isolation Country</b> | <b>Host Name</b> |
|-------------------------------------------|---------------------------|------------------------|--------------------------|------------------|
| <i>Escherichia coli</i> strain Ecol_656   | CP018979                  | 2012                   | USA                      | Human            |
| <i>Escherichia coli</i> strain Ecol_AZ146 | CP018991                  | 2012                   | Italy                    | Human            |
| <i>Escherichia coli</i> strain 4/0        | CP023849                  | 2009                   | Sweden                   | Human            |
| <i>Escherichia coli</i> strain S65EC      | CP036245                  | 2009                   | Australia                | Human            |
| <i>Escherichia coli</i> str. TO217        | LS992192                  |                        | Germany                  | -                |
| <i>Escherichia coli</i> strain p11A       | CP049077                  | 2015                   | USA                      | Human            |
| <i>Escherichia coli</i> strain p4A        | CP049085                  | 2015                   | USA                      | Human            |
| <i>Escherichia coli</i> strain THO-003    | AP022525                  | 2018                   | Japan                    | Human            |

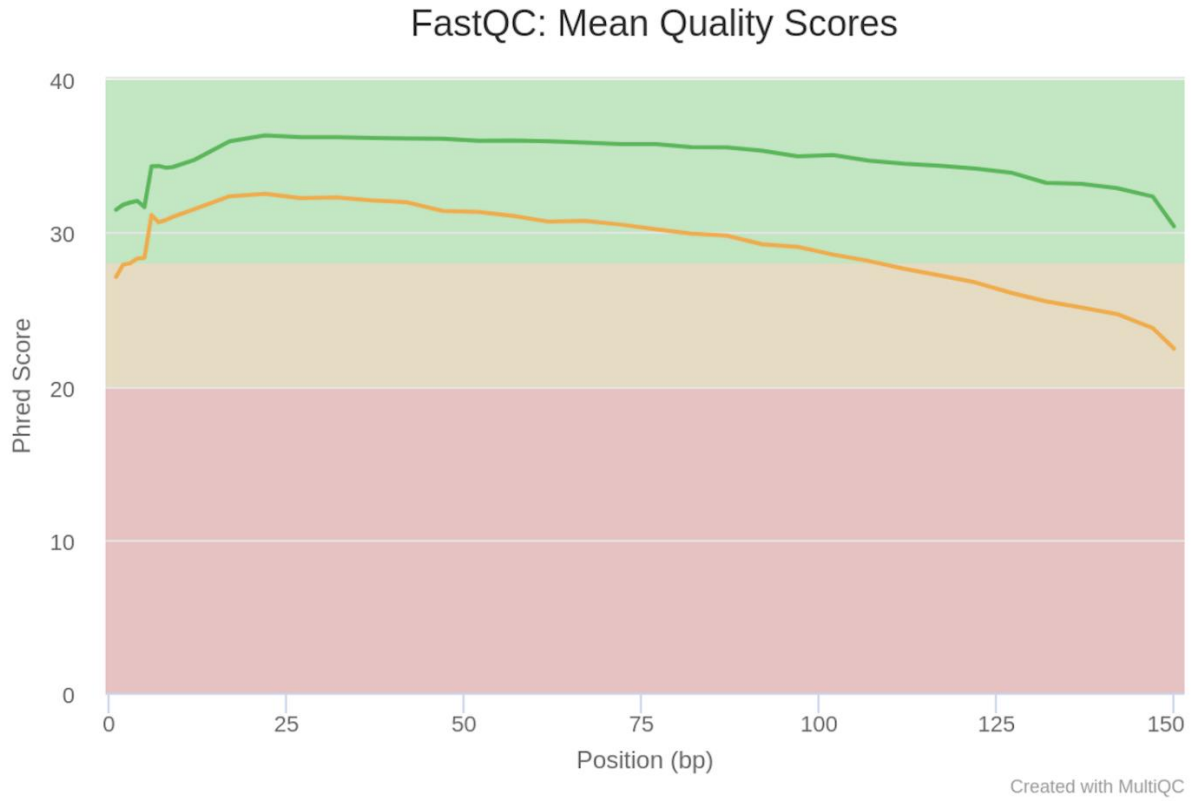

Figure S1: Mean quality values (Phred scores) of sequence reads. Green, forward reads; orange, reverse reads.

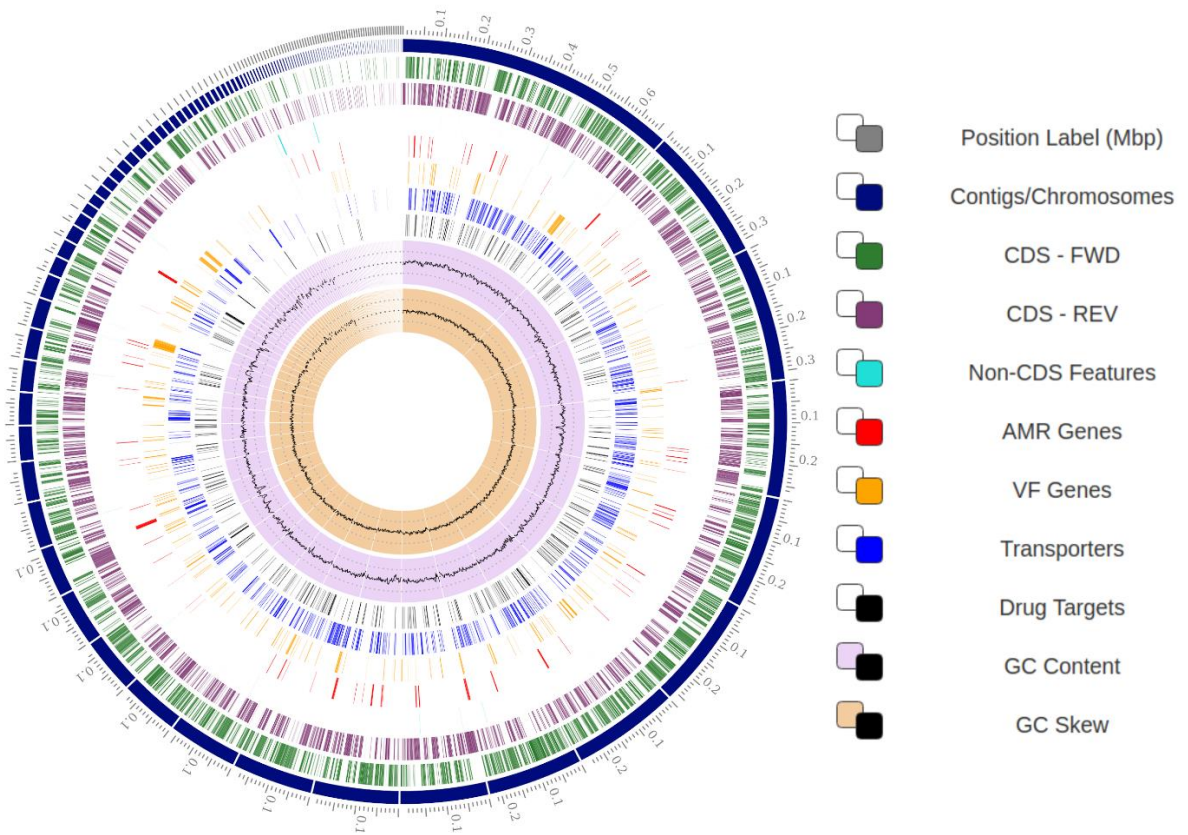

Figure S2: Circular view of the L16 genome.

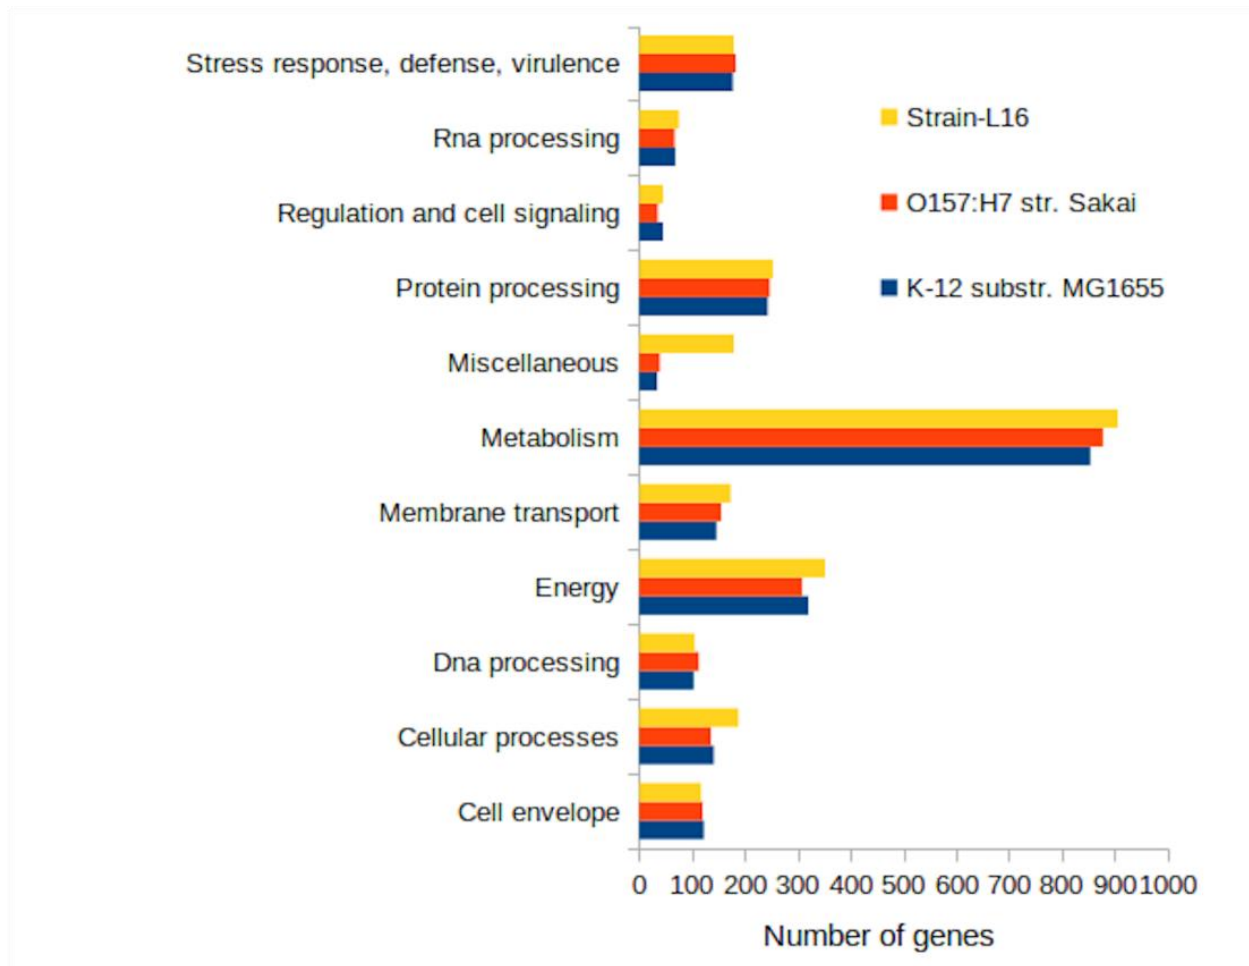

Figure S3: Comparison of the protein subsystems of L16 with two *E. coli* reference genomes, K-12 substr. MG1655 and O157:H7 str. Sakai.

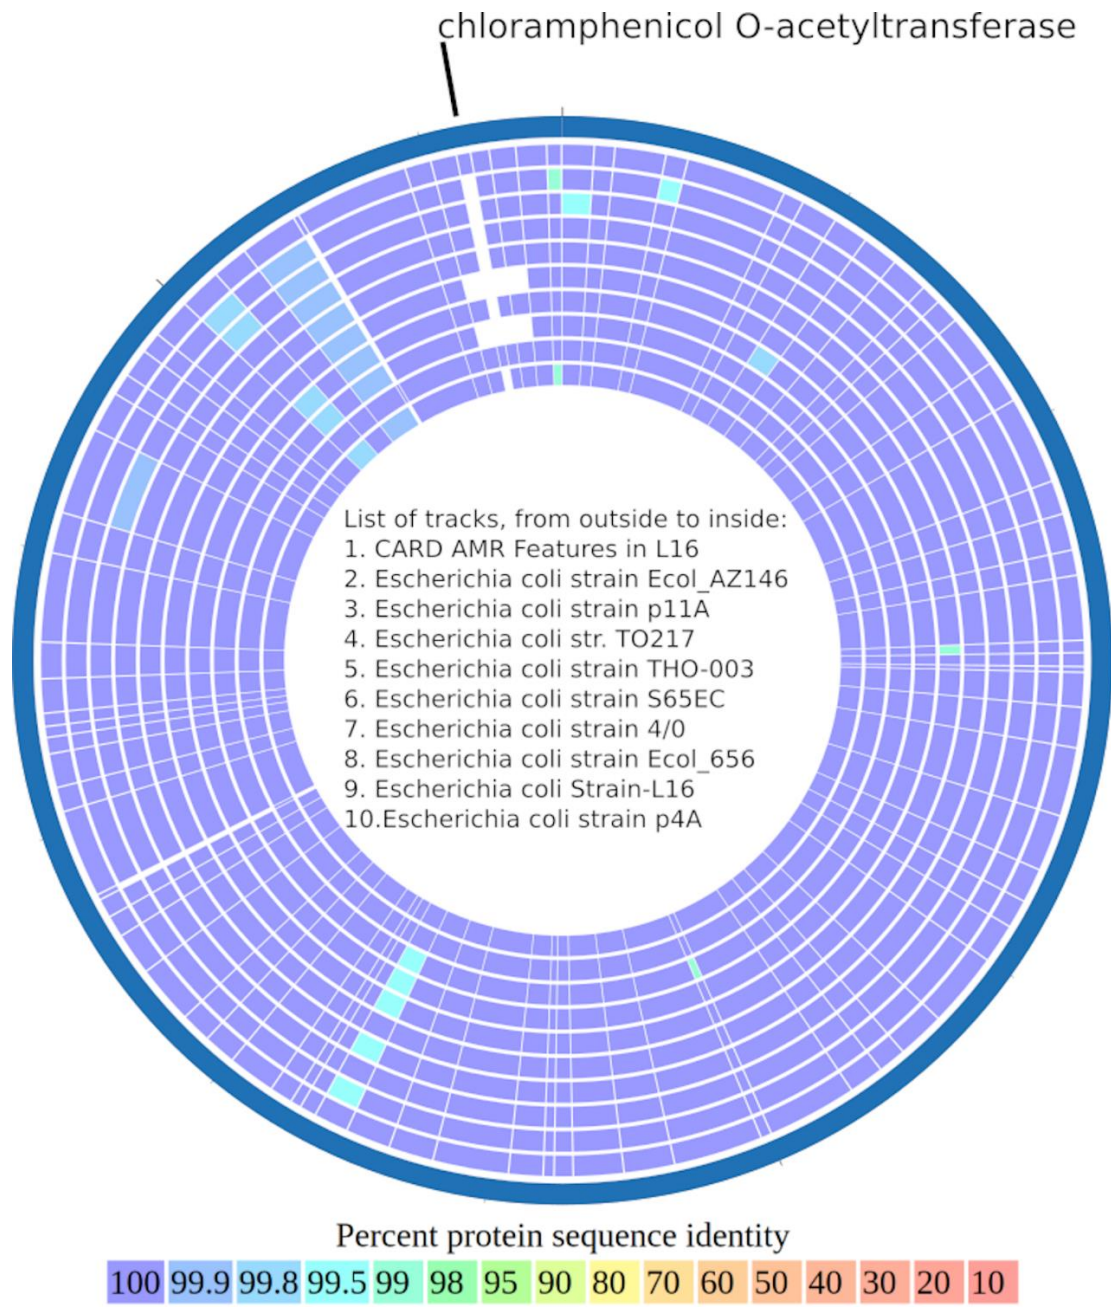

Figure S4: PATRIC alignment of the AMR protein features of L16 to the eight closely related genomes.
